# Supplementary material for: Mechanical Resistance and Tissue Structure of Claw Denticles of Various Sizes in the Mud Crab, Scylla serrata
Source: MDPI journal article supplement (doi:10.3390/ma16114114), 2023-05-31
Supplement: s1 [file s1]

## Mechanical Resistance and Tissue Structure of Claw Denticles of Various Sizes in the Mud Crab, *Scylla serrata*

Tadanobu Inoue, Yuka Hara and Koji Nakazato

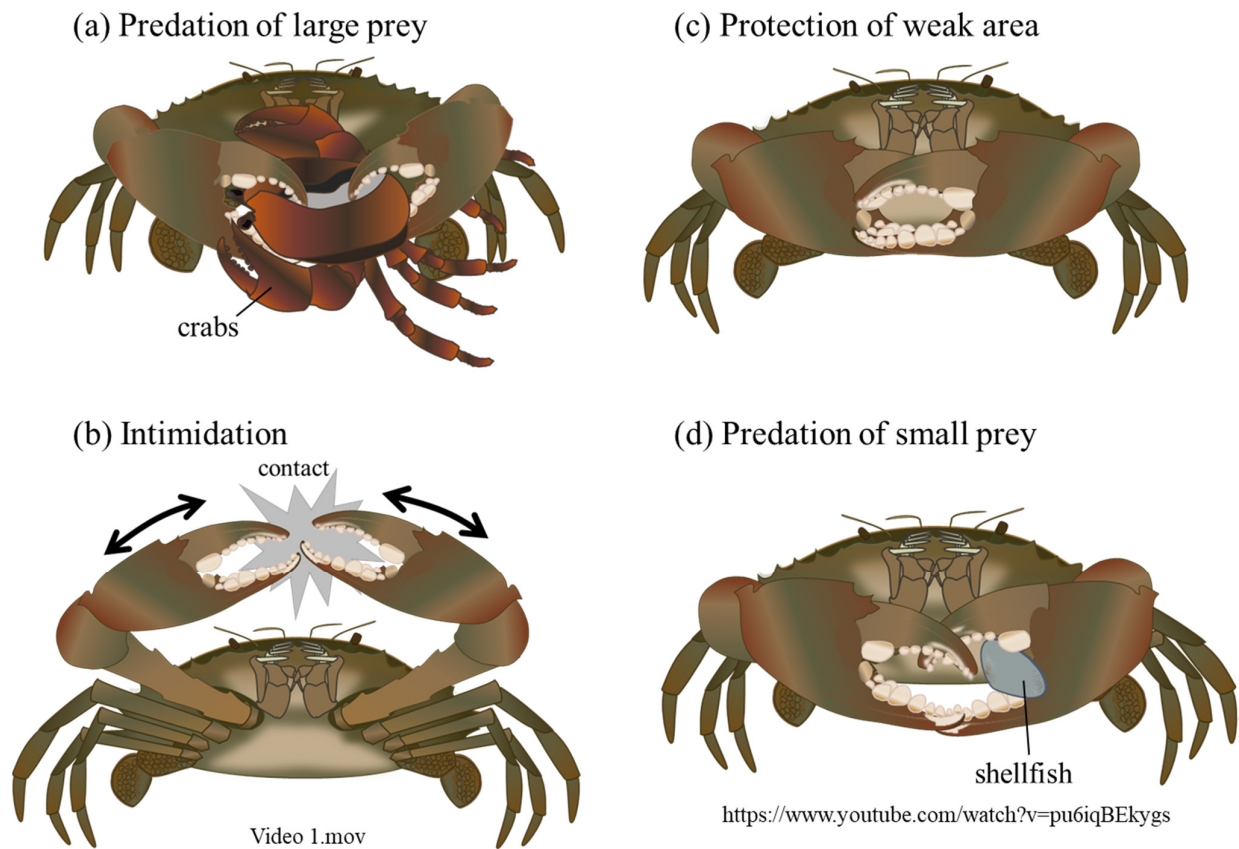

**Figure S1.** Schematic illustrations of predation, attack, and defense of the mud crab, *Scylla serrata*, which has huge claws comparable to its body size.

**Video S1.mov.** The mud crab's intimidation.
